# Supplementary material
Source: MDPI journal article supplement (https://www.mdpi.com/2673-4184/1/4/17)
Supplement: s1 [file s1]

**Supplementary Figure S1. Sociodemographic characteristics of analytical sample (n=1102) and attrition group (n=233, missing at follow-up)**

| <b>sociodemographic characteristics</b>              | <b>Respondent group<br/>n (%)</b> | <b>Attrition group<br/>n (%)</b> |
|------------------------------------------------------|-----------------------------------|----------------------------------|
| <b>All women</b>                                     | 1102 (82.5)                       | 233 (17.5)                       |
| <b>Age group at T1</b>                               |                                   |                                  |
| <25                                                  | 213 (78)                          | 62 (22)                          |
| 25-35                                                | 678 (84)                          | 126 (16)                         |
| >35                                                  | 211 (82)                          | 45 (18)                          |
| p value                                              | <b>0.035</b>                      |                                  |
| <b>Marital Status at T1</b>                          |                                   |                                  |
| Married/ domestic partnership                        | 1021 (84)                         | 194 (16)                         |
| separated/ divorced/ other                           | 821(68)                           | 39 (32)                          |
| p value                                              | <b>&lt; 0.001</b>                 |                                  |
| <b>Highest level of educational attainment at T1</b> |                                   |                                  |
| No postschool qualification                          | 508 (80)                          | 128 (20)                         |
| Diploma and vocational education                     | 234 (80)                          | 59 (20)                          |
| University degree                                    | 360 (89)                          | 46 (11)                          |
| p value                                              | <b>0.001</b>                      |                                  |
| <b>Country of Origin</b>                             |                                   |                                  |
| Women born in Host nation                            | 524 (81)                          | 126 (19)                         |
| Women from conflict-affected countries               | 578 (84)                          | 107 (16)                         |
|                                                      | 0.07                              |                                  |
